# Supplementary material for: Non-targeted urine metabolomics and associations with prevalent and incident type 2 diabetes
Source: PubMed Central journal article supplement (PMC7536211; doi:10.1038/s41598-020-72456-y), 2020-10-05
Supplement: 41598_2020_72456_MOESM1_ESM.pdf [file 41598_2020_72456_MOESM1_ESM.pdf]

In accordance to Nature Publishing Groups Authorship Policy we agree to change the authors of the manuscript as indicated below.

**NAME OF JOURNAL:** Scientific Reports

**TITLE OF MANUSCRIPT:** Non-targeted urine metabolomics and associations with prevalent and incident type 2 diabetes

**MANUSCRIPT NUMBER:** doi: 10.1038/s41598-020-72456-y

**CORRESPONDING AUTHORS NAME:** Christoph Nowak

**PREVIOUS AUTHOR NAMES:**

1. Christoph Nowak
2. Samira Salihovic
3. Corey D. Broeckling
4. Andrea Ganna
5. Jessica E. Prenni
6. Johan Sundström
7. Christian Berne
8. Lars Lind
9. Erik Ingelsson
10. Tove Fall
11. Johan Ärnlöv

**UPDATED AUTHOR NAMES:**

1. Samira Salihovic
2. Corey D. Broeckling
3. Andrea Ganna
4. Jessica E. Prenni
5. Johan Sundström
6. Christian Berne
7. Lars Lind
8. Erik Ingelsson
9. Tove Fall
10. Johan Ärnlöv
11. Christoph Nowak

**CHANGE TO AUTHOR LIST:**

1. Samira Salihovic
2. Corey D. Broeckling
3. Andrea Ganna
4. Jessica E. Prenni
5. Johan Sundström
6. Christian Berne
7. Lars Lind
8. Erik Ingelsson
9. Tove Fall
10. Johan Ärnlöv

## 11. Christoph Nowak

| Print Name             | Signature                                                                            | Date                      |
|------------------------|--------------------------------------------------------------------------------------|---------------------------|
| 1. Samira Salihovic    |    | September 8, 2020         |
| 2. Corey D. Broeckling |     | 2020-09-08                |
| 3. Andrea Ganna        |     | 2020-09-08                |
| 4. Jessica E. Prenni   |     | 09/08/2020                |
| 5. Johan Sundström     |   | 2020-09-08                |
| 6. Christian Berne     |   | September 8, 2020         |
| 7. Lars Lind           |   | September 8, 2020         |
| 8. Erik Ingelsson      |   | September 8, 2020         |
| 9. Tove Fall           |   | Sept 8 <sup>th</sup> 2020 |
| 10. Johan Ärnlov       |   | September 8, 2020         |
| 11. Christoph Nowak    |  | 8 Sept 2020               |
